# Supplementary material for: “Health Outcomes of Grandparents Caring for Double Orphans in South Africa”: What Are the Determinants?
Source: Preprints.org preprint supplement (doi:10.20944/preprints202309.0590.v1), 2023-09-08
Supplement: Supplementary file 1 [file supplementary]

## **APPENDIX**

**Table 1: Single age of younger grandparents – 25-34 years old**

| <b>Age</b> | <b>Frequency</b> | <b>%</b> |
|------------|------------------|----------|
| 25         | 10027            | 3.32     |
| 26         | 13979            | 4.62     |
| 27         | 5621             | 1.86     |
| 28         | 4204             | 1.39     |
| 29         | 5656             | 1.87     |
| 30         | 3109             | 1.03     |
| 31         | 10481            | 3.47     |
| 32         | 10575            | 3.50     |
| 33         | 10115            | 3.34     |
| 34         | 3939             | 1.30     |

**Table 2: Single Age of younger grandparents by Sex (25-34 years old)**

| <b>Age</b> | <b>Male</b>      |          | <b>Female</b>    |          | <b>Total</b>     |          |
|------------|------------------|----------|------------------|----------|------------------|----------|
|            | <b>Frequency</b> | <b>%</b> | <b>Frequency</b> | <b>%</b> | <b>Frequency</b> | <b>%</b> |
| 25         | 5393             | 4.94     | 4634             | 2.40     | 10027            | 3.32     |
| 26         | 7778             | 7.13     | 6202             | 3.21     | 13979            | 4.62     |
| 27         | 2277             | 2.09     | 3344             | 1.73     | 5621             | 1.86     |
| 28         | 1558             | 1.43     | 2646             | 1.37     | 4204             | 1.39     |
| 29         | 2773             | 2.54     | 2883             | 1.49     | 5656             | 1.87     |
| 30         | 2266             | 2.08     | 842              | 0.44     | 3109             | 1.03     |
| 31         | 7637             | 7.00     | 2845             | 1.47     | 10481            | 3.47     |
| 32         | 3174             | 2.91     | 7400             | 3.83     | 10575            | 3.50     |
| 33         | 1926             | 1.76     | 8190             | 4.24     | 10115            | 3.34     |
| 34         | 1698             | 1.56     | 2241             | 1.16     | 3939             | 1.30     |

**Table 3: Single age by province (Frequency) (25-34 years old)**

| Age | Western Cape | Eastern Cape | Northern Cape | Free State | KwaZulu-Natal | North West | Gauteng | Mpumalanga | Limpopo | South Africa |
|-----|--------------|--------------|---------------|------------|---------------|------------|---------|------------|---------|--------------|
| 25  | 864          | 4440         | 127           | 0          | 604           | 0          | 1944    | 2049       | 0       | 10027        |
| 26  | 3847         | 0            | 852           | 2922       | 1131          | 973        | 2030    | 0          | 2225    | 13979        |
| 27  | 83           | 316          | 0             | 0          | 3184          | 1707       | 330     | 0          | 0       | 5621         |
| 28  | 102          | 0            | 0             | 0          | 1456          | 0          | 0       | 2646       | 0       | 4204         |
| 29  | 913          | 1413         | 403           | 219        | 612           | 0          | 1950    | 147        | 0       | 5656         |
| 30  | 210          | 0            | 0             | 0          | 1035          | 0          | 1864    | 0          | 0       | 3109         |
| 31  | 165          | 1350         | 0             | 278        | 157           | 0          | 8532    | 0          | 0       | 10481        |
| 32  | 0            | 1304         | 0             | 2650       | 2990          | 946        | 1839    | 0          | 845     | 10575        |
| 33  | 0            | 2154         | 0             | 547        | 786           | 0          | 2981    | 0          | 3646    | 10115        |
| 34  | 660          | 2036         | 0             | 0          | 0             | 0          | 522     | 720        | 0       | 3939         |

**Table 4: Single Age by Province (Percentage) (25-34 years old)**

| Age | Western Cape | Eastern Cape | Northern Cape | Free State | KwaZulu-Natal | North West | Gauteng | Mpumalanga | Limpopo | South Africa |
|-----|--------------|--------------|---------------|------------|---------------|------------|---------|------------|---------|--------------|
| 25  | 1.93         | 13.03        | 2.32          | 0.00       | 1.13          | 0.00       | 2.09    | 10.49      | 0.00    | 3.32         |
| 26  | 8.60         | 0.00         | 15.56         | 25.47      | 2.12          | 6.92       | 2.19    | 0.00       | 8.26    | 4.62         |
| 27  | 0.19         | 0.93         | 0.00          | 0.00       | 5.96          | 12.14      | 0.36    | 0.00       | 0.00    | 1.86         |
| 28  | 0.23         | 0.00         | 0.00          | 0.00       | 2.73          | 0.00       | 0.00    | 13.55      | 0.00    | 1.39         |
| 29  | 2.04         | 4.15         | 7.36          | 1.91       | 1.15          | 0.00       | 2.10    | 0.75       | 0.00    | 1.87         |
| 30  | 0.47         | 0.00         | 0.00          | 0.00       | 1.94          | 0.00       | 2.01    | 0.00       | 0.00    | 1.03         |
| 31  | 0.37         | 3.96         | 0.00          | 2.42       | 0.29          | 0.00       | 9.19    | 0.00       | 0.00    | 3.47         |
| 32  | 0.00         | 3.83         | 0.00          | 23.10      | 5.60          | 6.73       | 1.98    | 0.00       | 3.14    | 3.50         |
| 33  | 0.00         | 6.32         | 0.00          | 4.77       | 1.47          | 0.00       | 3.21    | 0.00       | 13.53   | 3.34         |
| 34  | 1.48         | 5.98         | 0.00          | 0.00       | 0.00          | 0.00       | 0.56    | 3.69       | 0.00    | 1.30         |

**Table 5: Single age of grandparent caregivers of double orphans in South Africa, 2017**

| Age   | Frequency | %    |
|-------|-----------|------|
| 25    | 10027     | 3.32 |
| 26    | 13979     | 4.62 |
| 27    | 5621      | 1.86 |
| 28    | 4204      | 1.39 |
| 29    | 5656      | 1.87 |
| 30    | 3109      | 1.03 |
| 31    | 10481     | 3.47 |
| 32    | 10575     | 3.50 |
| 33    | 10115     | 3.34 |
| 34    | 3939      | 1.30 |
| 35    | 3510      | 1.16 |
| 36    | 3397      | 1.12 |
| 37    | 4711      | 1.56 |
| 38    | 8940      | 2.96 |
| 39    | 16665     | 5.51 |
| 40    | 9219      | 3.05 |
| 41    | 6218      | 2.06 |
| 42    | 1052      | 0.35 |
| 43    | 6564      | 2.17 |
| 44    | 5113      | 1.69 |
| 45    | 1864      | 0.62 |
| 46    | 9032      | 2.99 |
| 47    | 10764     | 3.56 |
| 48    | 1175      | 0.39 |
| 49    | 3943      | 1.30 |
| 50    | 2059      | 0.68 |
| 51    | 4915      | 1.62 |
| 52    | 12398     | 4.10 |
| 53    | 8199      | 2.71 |
| 54    | 3500      | 1.16 |
| 55    | 4331      | 1.43 |
| 56    | 815       | 0.27 |
| 57    | 6171      | 2.04 |
| 58    | 8509      | 2.81 |
| 59    | 7961      | 2.63 |
| 60    | 6877      | 2.27 |
| 61    | 2438      | 0.81 |
| 62    | 8458      | 2.80 |
| 63    | 5872      | 1.94 |
| 64    | 60        | 0.02 |
| 65    | 7071      | 2.34 |
| 66    | 884       | 0.29 |
| 67    | 1139      | 0.38 |
| 68    | 5557      | 1.84 |
| 70    | 2531      | 0.84 |
| 71    | 4522      | 1.50 |
| 72    | 4386      | 1.45 |
| 73    | 721       | 0.24 |
| 74    | 8752      | 2.89 |
| 75    | 395       | 0.13 |
| 77    | 1781      | 0.59 |
| 78    | 762       | 0.25 |
| 82    | 6297      | 2.08 |
| 84    | 114       | 0.04 |
| 85    | 616       | 0.20 |
| 86    | 2585      | 0.85 |
| 99    | 1929      | 0.64 |
| Total | 302,476   | 100  |

**Table 6: Single age by sex of grandparent caregivers of double orphans in South Africa, 2017.**

| Age          | Male          |            | Female        |            | Total         |            |
|--------------|---------------|------------|---------------|------------|---------------|------------|
|              | Frequency     | %          | Frequency     | %          | Frequency     | %          |
| 25           | 5393          | 4.94       | 4634          | 2.40       | 10027         | 3.32       |
| 26           | 7778          | 7.13       | 6202          | 3.21       | 13979         | 4.62       |
| 27           | 2277          | 2.09       | 3344          | 1.73       | 5621          | 1.86       |
| 28           | 1558          | 1.43       | 2646          | 1.37       | 4204          | 1.39       |
| 29           | 2773          | 2.54       | 2883          | 1.49       | 5656          | 1.87       |
| 30           | 2266          | 2.08       | 842           | 0.44       | 3109          | 1.03       |
| 31           | 7637          | 7.00       | 2845          | 1.47       | 10481         | 3.47       |
| 32           | 3174          | 2.91       | 7400          | 3.83       | 10575         | 3.50       |
| 33           | 1926          | 1.76       | 8190          | 4.24       | 10115         | 3.34       |
| 34           | 1698          | 1.56       | 2241          | 1.16       | 3939          | 1.30       |
| 35           | 2212          | 2.03       | 1298          | 0.67       | 3510          | 1.16       |
| 36           | 536           | 0.49       | 2862          | 1.48       | 3397          | 1.12       |
| 37           | 1419          | 1.30       | 3292          | 1.70       | 4711          | 1.56       |
| 38           | 4311          | 3.95       | 4629          | 2.39       | 8940          | 2.96       |
| 39           | 8932          | 8.19       | 7733          | 4.00       | 16665         | 5.51       |
| 40           | 3664          | 3.36       | 5555          | 2.87       | 9219          | 3.05       |
| 41           | 503           | 0.46       | 5715          | 2.96       | 6218          | 2.06       |
| 42           | 856           | 0.78       | 196           | 0.10       | 1052          | 0.35       |
| 43           | 226           | 0.21       | 6338          | 3.28       | 6564          | 2.17       |
| 44           | 3677          | 3.37       | 1436          | 0.74       | 5113          | 1.69       |
| 45           | 0             | 0.00       | 1864          | 0.96       | 1864          | 0.62       |
| 46           | 3514          | 3.22       | 5518          | 2.85       | 9032          | 2.99       |
| 47           | 784           | 0.72       | 9980          | 5.16       | 10764         | 3.56       |
| 48           | 0             | 0.00       | 1175          | 0.61       | 1175          | 0.39       |
| 49           | 1458          | 1.34       | 2485          | 1.29       | 3943          | 1.30       |
| 50           | 1044          | 0.96       | 1015          | 0.53       | 2059          | 0.68       |
| 51           | 946           | 0.87       | 3969          | 2.05       | 4915          | 1.62       |
| 52           | 1913          | 1.75       | 10485         | 5.42       | 12398         | 4.10       |
| 53           | 2149          | 1.97       | 6050          | 3.13       | 8199          | 2.71       |
| 54           | 3148          | 2.88       | 352           | 0.18       | 3500          | 1.16       |
| 55           | 292           | 0.27       | 4039          | 2.09       | 4331          | 1.43       |
| 56           | 0             | 0.00       | 815           | 0.42       | 815           | 0.27       |
| 57           | 2225          | 2.04       | 3946          | 2.04       | 6171          | 2.04       |
| 58           | 928           | 0.85       | 7580          | 3.92       | 8509          | 2.81       |
| 59           | 3263          | 2.99       | 4698          | 2.43       | 7961          | 2.63       |
| 60           | 657           | 0.60       | 6220          | 3.22       | 6877          | 2.27       |
| 61           | 1438          | 1.32       | 1000          | 0.52       | 2438          | 0.81       |
| 62           | 7321          | 6.71       | 1136          | 0.59       | 8458          | 2.80       |
| 63           | 704           | 0.64       | 5169          | 2.67       | 5872          | 1.94       |
| 64           | 60            | 0.06       | 0             | 0.00       | 60            | 0.02       |
| 65           | 5630          | 5.16       | 1441          | 0.75       | 7071          | 2.34       |
| 66           | 884           | 0.81       | 0             | 0.00       | 884           | 0.29       |
| 67           | 1139          | 1.04       | 0             | 0.00       | 1139          | 0.38       |
| 68           | 0             | 0.00       | 5557          | 2.87       | 5557          | 1.84       |
| 70           | 0             | 0.00       | 2531          | 1.31       | 2531          | 0.84       |
| 71           | 1839          | 1.69       | 2683          | 1.39       | 4522          | 1.50       |
| 72           | 3602          | 3.30       | 785           | 0.41       | 4386          | 1.45       |
| 73           | 721           | 0.66       | 0             | 0.00       | 721           | 0.24       |
| 74           | 0             | 0.00       | 8752          | 4.53       | 8752          | 2.89       |
| 75           | 395           | 0.36       | 0             | 0.00       | 395           | 0.13       |
| 77           | 42            | 0.04       | 1738          | 0.90       | 1781          | 0.59       |
| 78           | 0             | 0.00       | 762           | 0.39       | 762           | 0.25       |
| 82           | 98            | 0.09       | 6199          | 3.21       | 6297          | 2.08       |
| 84           | 114           | 0.10       | 0             | 0.00       | 114           | 0.04       |
| 85           | 0             | 0.00       | 616           | 0.32       | 616           | 0.20       |
| 86           | 0             | 0.00       | 2585          | 1.34       | 2585          | 0.85       |
| 99           | 0             | 0.00       | 1929          | 1.00       | 1929          | 0.64       |
| <b>Total</b> | <b>109122</b> | <b>100</b> | <b>193354</b> | <b>100</b> | <b>302476</b> | <b>100</b> |

**Table 7: Frequency distribution of single age by province among grandparent caregivers of double orphans in South Africa, 2017.**

| Age          | Western Cape | Eastern Cape | Northern Cape | Free State   | KwaZulu-Natal | North West   | Gauteng      | Mpumalanga   | Limpopo      | South Africa  |
|--------------|--------------|--------------|---------------|--------------|---------------|--------------|--------------|--------------|--------------|---------------|
| 25           | 864          | 4440         | 127           | 0            | 604           | 0            | 1944         | 2049         | 0            | 10027         |
| 26           | 3847         | 0            | 852           | 2922         | 1131          | 973          | 2030         | 0            | 2225         | 13979         |
| 27           | 83           | 316          | 0             | 0            | 3184          | 1707         | 330          | 0            | 0            | 5621          |
| 28           | 102          | 0            | 0             | 0            | 1456          | 0            | 0            | 2646         | 0            | 4204          |
| 29           | 913          | 1413         | 403           | 219          | 612           | 0            | 1950         | 147          | 0            | 5656          |
| 30           | 210          | 0            | 0             | 0            | 1035          | 0            | 1864         | 0            | 0            | 3109          |
| 31           | 165          | 1350         | 0             | 278          | 157           | 0            | 8532         | 0            | 0            | 10481         |
| 32           | 0            | 1304         | 0             | 2650         | 2990          | 946          | 1839         | 0            | 845          | 10575         |
| 33           | 0            | 2154         | 0             | 547          | 786           | 0            | 2981         | 0            | 3646         | 10115         |
| 34           | 660          | 2036         | 0             | 0            | 0             | 0            | 522          | 720          | 0            | 3939          |
| 35           | 1298         | 0            | 0             | 0            | 0             | 0            | 0            | 2212         | 0            | 3510          |
| 36           | 2171         | 0            | 0             | 0            | 536           | 0            | 690          | 0            | 0            | 3397          |
| 37           | 0            | 0            | 412           | 278          | 934           | 0            | 0            | 1419         | 1668         | 4711          |
| 38           | 481          | 0            | 0             | 1117         | 2695          | 0            | 3097         | 538          | 1012         | 8940          |
| 39           | 3164         | 2011         | 0             | 0            | 4902          | 0            | 6588         | 0            | 0            | 16665         |
| 40           | 2839         | 824          | 0             | 0            | 885           | 0            | 2445         | 0            | 2225         | 9219          |
| 41           | 0            | 1099         | 0             | 0            | 0             | 764          | 4355         | 0            | 0            | 6218          |
| 42           | 196          | 0            | 0             | 0            | 856           | 0            | 0            | 0            | 0            | 1052          |
| 43           | 226          | 1350         | 0             | 0            | 650           | 0            | 580          | 3757         | 0            | 6564          |
| 44           | 0            | 2714         | 336           | 0            | 784           | 0            | 1279         | 0            | 0            | 5113          |
| 45           | 0            | 0            | 0             | 0            | 1104          | 0            | 760          | 0            | 0            | 1864          |
| 46           | 0            | 0            | 0             | 0            | 462           | 2087         | 4475         | 0            | 2008         | 9032          |
| 47           | 0            | 0            | 0             | 0            | 784           | 0            | 9980         | 0            | 0            | 10764         |
| 48           | 667          | 0            | 0             | 288          | 0             | 0            | 220          | 0            | 0            | 1175          |
| 49           | 970          | 703          | 580           | 0            | 231           | 0            | 421          | 0            | 1037         | 3943          |
| 50           | 0            | 0            | 0             | 0            | 0             | 0            | 1044         | 1015         | 0            | 2059          |
| 51           | 620          | 2585         | 0             | 0            | 426           | 946          | 0            | 0            | 337          | 4915          |
| 52           | 8369         | 0            | 0             | 0            | 2116          | 0            | 1913         | 0            | 0            | 12398         |
| 53           | 4212         | 703          | 0             | 0            | 1445          | 1043         | 0            | 86           | 708          | 8199          |
| 54           | 352          | 0            | 0             | 0            | 226           | 0            | 2922         | 0            | 0            | 3500          |
| 55           | 0            | 0            | 0             | 0            | 292           | 0            | 4039         | 0            | 0            | 4331          |
| 56           | 0            | 0            | 0             | 0            | 815           | 0            | 0            | 0            | 0            | 815           |
| 57           | 846          | 0            | 0             | 0            | 803           | 1117         | 1181         | 0            | 2225         | 6171          |
| 58           | 7159         | 0            | 0             | 0            | 422           | 0            | 928          | 0            | 0            | 8509          |
| 59           | 0            | 718          | 439           | 770          | 1247          | 0            | 3019         | 432          | 1335         | 7961          |
| 60           | 0            | 0            | 640           | 0            | 2220          | 1721         | 657          | 251          | 1389         | 6877          |
| 61           | 0            | 587          | 505           | 0            | 604           | 0            | 741          | 0            | 0            | 2438          |
| 62           | 679          | 0            | 0             | 0            | 599           | 0            | 5351         | 0            | 1829         | 8458          |
| 63           | 0            | 0            | 0             | 0            | 3586          | 0            | 0            | 725          | 1561         | 5872          |
| 64           | 60           | 0            | 0             | 0            | 0             | 0            | 0            | 0            | 0            | 60            |
| 65           | 0            | 4341         | 0             | 0            | 741           | 700          | 0            | 1289         | 0            | 7071          |
| 66           | 0            | 0            | 0             | 0            | 884           | 0            | 0            | 0            | 0            | 884           |
| 67           | 0            | 0            | 0             | 475          | 0             | 0            | 0            | 0            | 664          | 1139          |
| 68           | 0            | 1563         | 333           | 0            | 820           | 0            | 2841         | 0            | 0            | 5557          |
| 70           | 0            | 601          | 0             | 0            | 769           | 0            | 1161         | 0            | 0            | 2531          |
| 71           | 0            | 1254         | 0             | 0            | 0             | 0            | 1839         | 1430         | 0            | 4522          |
| 72           | 278          | 0            | 0             | 0            | 3895          | 213          | 0            | 0            | 0            | 4386          |
| 73           | 138          | 0            | 0             | 0            | 583           | 0            | 0            | 0            | 0            | 721           |
| 74           | 0            | 0            | 0             | 0            | 884           | 1323         | 6546         | 0            | 0            | 8752          |
| 75           | 0            | 0            | 395           | 0            | 0             | 0            | 0            | 0            | 0            | 395           |
| 77           | 0            | 0            | 0             | 0            | 42            | 0            | 1738         | 0            | 0            | 1781          |
| 78           | 0            | 0            | 240           | 0            | 0             | 522          | 0            | 0            | 0            | 762           |
| 82           | 3164         | 0            | 98            | 0            | 0             | 0            | 0            | 810          | 2225         | 6297          |
| 84           | 0            | 0            | 114           | 0            | 0             | 0            | 0            | 0            | 0            | 114           |
| 85           | 0            | 0            | 0             | 0            | 616           | 0            | 0            | 0            | 0            | 616           |
| 86           | 0            | 0            | 0             | 0            | 2585          | 0            | 0            | 0            | 0            | 2585          |
| 99           | 0            | 0            | 0             | 1929         | 0             | 0            | 0            | 0            | 0            | 1929          |
| <b>Total</b> | <b>44732</b> | <b>34070</b> | <b>5475</b>   | <b>11472</b> | <b>53401</b>  | <b>14061</b> | <b>92799</b> | <b>19525</b> | <b>26940</b> | <b>302476</b> |

**Table 8: Percentage distribution of single age by province among grandparent caregivers of double orphans in South Africa, 2017**

| Age/Province | Western Cape | Eastern Cape | Northern Cape | Free State | KwaZulu-Natal | North West | Gauteng | Mpumalanga | Limpopo | South Africa |
|--------------|--------------|--------------|---------------|------------|---------------|------------|---------|------------|---------|--------------|
| 25           | 1.93         | 13.03        | 2.32          | 0.00       | 1.13          | 0.00       | 2.09    | 10.49      | 0.00    | 3.32         |
| 26           | 8.60         | 0.00         | 15.56         | 25.47      | 2.12          | 6.92       | 2.19    | 0.00       | 8.26    | 4.62         |
| 27           | 0.19         | 0.93         | 0.00          | 0.00       | 5.96          | 12.14      | 0.36    | 0.00       | 0.00    | 1.86         |
| 28           | 0.23         | 0.00         | 0.00          | 0.00       | 2.73          | 0.00       | 0.00    | 13.55      | 0.00    | 1.39         |
| 29           | 2.04         | 4.15         | 7.36          | 1.91       | 1.15          | 0.00       | 2.10    | 0.75       | 0.00    | 1.87         |
| 30           | 0.47         | 0.00         | 0.00          | 0.00       | 1.94          | 0.00       | 2.01    | 0.00       | 0.00    | 1.03         |
| 31           | 0.37         | 3.96         | 0.00          | 2.42       | 0.29          | 0.00       | 9.19    | 0.00       | 0.00    | 3.47         |
| 32           | 0.00         | 3.83         | 0.00          | 23.10      | 5.60          | 6.73       | 1.98    | 0.00       | 3.14    | 3.50         |
| 33           | 0.00         | 6.32         | 0.00          | 4.77       | 1.47          | 0.00       | 3.21    | 0.00       | 13.53   | 3.34         |
| 34           | 1.48         | 5.98         | 0.00          | 0.00       | 0.00          | 0.00       | 0.56    | 3.69       | 0.00    | 1.30         |
| 35           | 2.90         | 0.00         | 0.00          | 0.00       | 0.00          | 0.00       | 0.00    | 11.33      | 0.00    | 1.16         |
| 36           | 4.85         | 0.00         | 0.00          | 0.00       | 1.00          | 0.00       | 0.74    | 0.00       | 0.00    | 1.12         |
| 37           | 0.00         | 0.00         | 7.52          | 2.42       | 1.75          | 0.00       | 0.00    | 7.27       | 6.19    | 1.56         |
| 38           | 1.08         | 0.00         | 0.00          | 9.73       | 5.05          | 0.00       | 3.34    | 2.76       | 3.76    | 2.96         |
| 39           | 7.07         | 5.90         | 0.00          | 0.00       | 9.18          | 0.00       | 7.10    | 0.00       | 0.00    | 5.51         |
| 40           | 6.35         | 2.42         | 0.00          | 0.00       | 1.66          | 0.00       | 2.63    | 0.00       | 8.26    | 3.05         |
| 41           | 0.00         | 3.23         | 0.00          | 0.00       | 0.00          | 5.43       | 4.69    | 0.00       | 0.00    | 2.06         |
| 42           | 0.44         | 0.00         | 0.00          | 0.00       | 1.60          | 0.00       | 0.00    | 0.00       | 0.00    | 0.35         |
| 43           | 0.51         | 3.96         | 0.00          | 0.00       | 1.22          | 0.00       | 0.63    | 19.24      | 0.00    | 2.17         |
| 44           | 0.00         | 7.97         | 6.14          | 0.00       | 1.47          | 0.00       | 1.38    | 0.00       | 0.00    | 1.69         |
| 45           | 0.00         | 0.00         | 0.00          | 0.00       | 2.07          | 0.00       | 0.82    | 0.00       | 0.00    | 0.62         |
| 46           | 0.00         | 0.00         | 0.00          | 0.00       | 0.86          | 14.84      | 4.82    | 0.00       | 7.45    | 2.99         |
| 47           | 0.00         | 0.00         | 0.00          | 0.00       | 1.47          | 0.00       | 10.75   | 0.00       | 0.00    | 3.56         |
| 48           | 1.49         | 0.00         | 0.00          | 2.51       | 0.00          | 0.00       | 0.24    | 0.00       | 0.00    | 0.39         |
| 49           | 2.17         | 2.06         | 10.60         | 0.00       | 0.43          | 0.00       | 0.45    | 0.00       | 3.85    | 1.30         |
| 50           | 0.00         | 0.00         | 0.00          | 0.00       | 0.00          | 0.00       | 1.12    | 5.20       | 0.00    | 0.68         |
| 51           | 1.39         | 7.59         | 0.00          | 0.00       | 0.80          | 6.73       | 0.00    | 0.00       | 1.25    | 1.62         |
| 52           | 18.71        | 0.00         | 0.00          | 0.00       | 3.96          | 0.00       | 2.06    | 0.00       | 0.00    | 4.10         |
| 53           | 9.42         | 2.06         | 0.00          | 0.00       | 2.71          | 7.42       | 0.00    | 0.44       | 2.63    | 2.71         |
| 54           | 0.79         | 0.00         | 0.00          | 0.00       | 0.42          | 0.00       | 3.15    | 0.00       | 0.00    | 1.16         |
| 55           | 0.00         | 0.00         | 0.00          | 0.00       | 0.55          | 0.00       | 4.35    | 0.00       | 0.00    | 1.43         |
| 56           | 0.00         | 0.00         | 0.00          | 0.00       | 1.53          | 0.00       | 0.00    | 0.00       | 0.00    | 0.27         |
| 57           | 1.89         | 0.00         | 0.00          | 0.00       | 1.50          | 7.94       | 1.27    | 0.00       | 8.26    | 2.04         |
| 58           | 16.00        | 0.00         | 0.00          | 0.00       | 0.79          | 0.00       | 1.00    | 0.00       | 0.00    | 2.81         |
| 59           | 0.00         | 2.11         | 8.02          | 6.72       | 2.33          | 0.00       | 3.25    | 2.21       | 4.95    | 2.63         |
| 60           | 0.00         | 0.00         | 11.68         | 0.00       | 4.16          | 12.24      | 0.71    | 1.29       | 5.16    | 2.27         |
| 61           | 0.00         | 1.72         | 9.23          | 0.00       | 1.13          | 0.00       | 0.80    | 0.00       | 0.00    | 0.81         |
| 62           | 1.52         | 0.00         | 0.00          | 0.00       | 1.12          | 0.00       | 5.77    | 0.00       | 6.79    | 2.80         |
| 63           | 0.00         | 0.00         | 0.00          | 0.00       | 6.71          | 0.00       | 0.00    | 3.71       | 5.80    | 1.94         |
| 64           | 0.13         | 0.00         | 0.00          | 0.00       | 0.00          | 0.00       | 0.00    | 0.00       | 0.00    | 0.02         |
| 65           | 0.00         | 12.74        | 0.00          | 0.00       | 1.39          | 4.98       | 0.00    | 6.60       | 0.00    | 2.34         |
| 66           | 0.00         | 0.00         | 0.00          | 0.00       | 1.66          | 0.00       | 0.00    | 0.00       | 0.00    | 0.29         |
| 67           | 0.00         | 0.00         | 0.00          | 4.14       | 0.00          | 0.00       | 0.00    | 0.00       | 2.46    | 0.38         |
| 68           | 0.00         | 4.59         | 6.07          | 0.00       | 1.54          | 0.00       | 3.06    | 0.00       | 0.00    | 1.84         |
| 70           | 0.00         | 1.76         | 0.00          | 0.00       | 1.44          | 0.00       | 1.25    | 0.00       | 0.00    | 0.84         |
| 71           | 0.00         | 3.68         | 0.00          | 0.00       | 0.00          | 0.00       | 1.98    | 7.32       | 0.00    | 1.50         |
| 72           | 0.62         | 0.00         | 0.00          | 0.00       | 7.29          | 1.52       | 0.00    | 0.00       | 0.00    | 1.45         |
| 73           | 0.31         | 0.00         | 0.00          | 0.00       | 1.09          | 0.00       | 0.00    | 0.00       | 0.00    | 0.24         |
| 74           | 0.00         | 0.00         | 0.00          | 0.00       | 1.66          | 9.41       | 7.05    | 0.00       | 0.00    | 2.89         |
| 75           | 0.00         | 0.00         | 7.22          | 0.00       | 0.00          | 0.00       | 0.00    | 0.00       | 0.00    | 0.13         |
| 77           | 0.00         | 0.00         | 0.00          | 0.00       | 0.08          | 0.00       | 1.87    | 0.00       | 0.00    | 0.59         |
| 78           | 0.00         | 0.00         | 4.39          | 0.00       | 0.00          | 3.71       | 0.00    | 0.00       | 0.00    | 0.25         |
| 82           | 7.07         | 0.00         | 1.78          | 0.00       | 0.00          | 0.00       | 0.00    | 4.15       | 8.26    | 2.08         |
| 84           | 0.00         | 0.00         | 2.09          | 0.00       | 0.00          | 0.00       | 0.00    | 0.00       | 0.00    | 0.04         |
| 85           | 0.00         | 0.00         | 0.00          | 0.00       | 1.15          | 0.00       | 0.00    | 0.00       | 0.00    | 0.20         |
| 86           | 0.00         | 0.00         | 0.00          | 0.00       | 4.84          | 0.00       | 0.00    | 0.00       | 0.00    | 0.85         |
| 99           | 0.00         | 0.00         | 0.00          | 16.81      | 0.00          | 0.00       | 0.00    | 0.00       | 0.00    | 0.64         |
| Total        | 100          | 100          | 100           | 100        | 100           | 100        | 100     | 100        | 100     | 100          |
